# Supplementary material for: Patient values and preferences on transcatheter or surgical aortic valve replacement therapy for aortic stenosis: a systematic review
Source: PubMed Central journal article supplement — BMJ Open. 2016 Sep 29;6(9):e014327. doi: 10.1136/bmjopen-2016-014327 (PMC5051506; doi:10.1136/bmjopen-2016-014327), 2016-09-29
Supplement: bmjopen-2016-014327supp_appendix2.pdf [file bmjopen-2016-014327supp_appendix2.pdf]

## Appendix 2. Search strategy for MEDLINE.

1. \*Attitude to Health/
2. \*Patient Participation/
3. preference\*.ti,ab.
4. \*Patient Preference/
5. choice.ti.
6. choices.ti.
7. value\*.ti.
8. health state values.ti,ab.
9. valuation\*.ti.
10. expectation\*.ti,ab.
11. attitude\*.ti,ab.
12. acceptab\*.ti,ab.
13. knowledge.ti,ab.
14. point of view.ti,ab.
15. user participation.ti,ab.
16. users participation.ti,ab.
17. users' participation.ti,ab.
18. user's participation.ti,ab.
19. patient participation.ti,ab.
20. patients' participation.ti,ab.
21. patients participation.ti,ab.
22. patient's participation.ti,ab.
23. patient perspective\*.ti,ab.
24. patients perspective\*.ti,ab.
25. patients' perspective\*.ti,ab.
26. patient's perspective\*.ti,ab.
27. patient perce\*.ti,ab.
28. patients perce\*.ti,ab.
29. patients' perce\*.ti,ab.
30. patient's perce\*.ti,ab.
31. health perception\*.ti,ab.
32. user view\*.ti,ab.
33. users view\*.ti,ab.
34. users' view\*.ti,ab.
35. user's view\*.ti,ab.
36. patient view\*.ti,ab.
37. patients view\*.ti,ab.
38. patients' view\*.ti,ab.
39. patient's view\*.ti,ab.
40. or/1-39
41. patient\*.ti.
42. user\*.ti.
43. men.ti.
44. women.ti.

45. or/41-44
46. exp \*Decision Making/
47. decision mak\*.ti,ab.
48. decisions mak\*.ti,ab.
49. decision\*.ti.
50. mak\*.ti.
51. 49 and 50
52. avoidance learning/
53. 46 or 47 or 48 or 51 or 52
54. 45 and 53
55. discrete choice.ti,ab.
56. decision board\*.ti,ab.
57. decision analy\*.ti,ab.
58. decision-support.ti,ab.
59. decision tool\*.ti,ab.
60. decision aid\*.ti,ab.
61. discrete-choice\*.ti,ab.
62. decision\*.ti,ab.
63. 55 or 56 or 57 or 58 or 59 or 60 or 61 or 62
64. 45 and 63
65. 54 or 64
66. decision support techniques/
67. (health and utilit\*).ti.
68. gamble\*.ti,ab.
69. prospect theory.ti,ab.
70. preference score.ti,ab.
71. preference elicitation.ti,ab.
72. health utilit\*.ti,ab.
73. (utility and (value\* or score\* or estimate\*)).mp. [mp=title, abstract, original title, name of substance word, subject heading word, keyword heading word, protocol supplementary concept word, rare disease supplementary concept word, unique identifier]
74. health state.ti,ab.
75. feeling thermometer\*.ti,ab.
76. best-worst scaling.ti,ab.
77. best worst scaling.mp.
78. best worst.ti,ab.
79. TTO.ti,ab.
80. time trade-off.ti,ab.
81. probability trade-off.ti,ab.
82. or/66-81
83. Choice Behavior/
84. or/66-83
85. preference based.ti,ab.
86. preference score.ti,ab.
87. multiattribute.ti,ab.

88. multi attribute.mp.
89. EuroQoL 5D.mp.
90. EuroQoL5D.ti,ab.
91. EQ5D.mp.
92. EQ 5D.ti,ab.
93. SF6D.ti,ab.
94. SF 6D.ti,ab.
95. HUI.ti,ab.
96. 15D.ti,ab.
97. or/85-96
98. SF36.ti,ab.
99. SF 36.ti,ab.
100. SF12.ti,ab.
101. SF 12.mp.
102. HRQoL.ti,ab.
103. QoL.ti,ab.
104. quality of life.ti,ab.
105. "Quality of Life"/
106. or/98-105
107. 40 or 65 or 84 or 97 or 106
108. Aortic Stenosis.mp. or exp Aortic Valve Stenosis/
109. (aortic valve implantation or TAVR or transcatheter or transfemoral or transapical or transaxillary or SAVR or heart valve replacement or surgical aortic valve replacement or surgical AVR or SAVR or TAVI or aortic valve replacement or transvascular).af.
110. 107 and 108 and 109
111. limit 110 to yr="2002 -Current"
112. limit 111 to humans
